# Supplementary material
Source: MDPI journal article supplement (https://www.mdpi.com/2571-9637/6/3/16)
Supplement: s1 [file s1]

## Supporting Information

# Using Highly Flexible SbSn@NC Nanofibers as Binderless Anodes for Sodium-Ion Batteries

Jiaojiao Liang<sup>1,2</sup>, Gengkun Fang<sup>1</sup>, Xinmiao Niu<sup>1</sup>, Zhihao Zhang<sup>1</sup>, Yufei Wang<sup>1</sup>,

Lingyuan Liao<sup>1</sup>, Xiaoming Zheng<sup>3</sup>, Di Huang<sup>1\*</sup>, Yuehua Wei<sup>4\*</sup>

1, Hunan University of Technology, College of Railway Transportation, Zhuzhou 412008, China

2, Qinghai Provincial Key Laboratory of Nanomaterials and Nanotechnology, Qinghai Minzu University, Qinghai 810007, China

3, Hunan Provincial Key Laboratory of Intelligent Sensors and Advanced Sensor Materials, School of Physics and Electronics, Hunan University of Science and Technology, Xiangtan 411201, China

4, Xiangtan University, School of Physics and Optoelectronics, Xiangtan 411105, China

\*Corresponding author: dihuang@hut.edu.cn, weiyuehua18@nudt.com

## Supplemental Figures

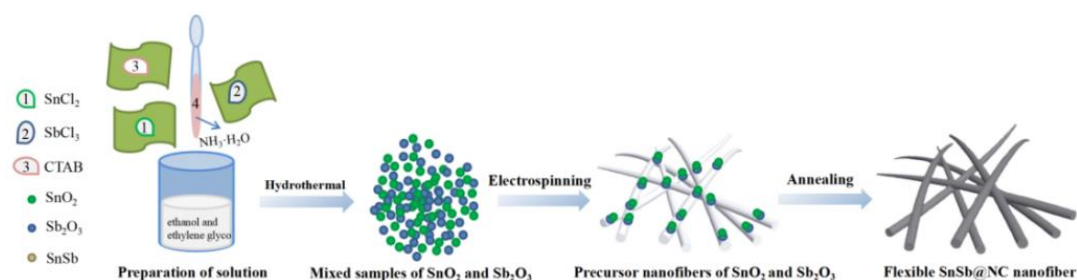

**Figure.S1** Schematic diagram synthesis of flexible SnSb carbon composite

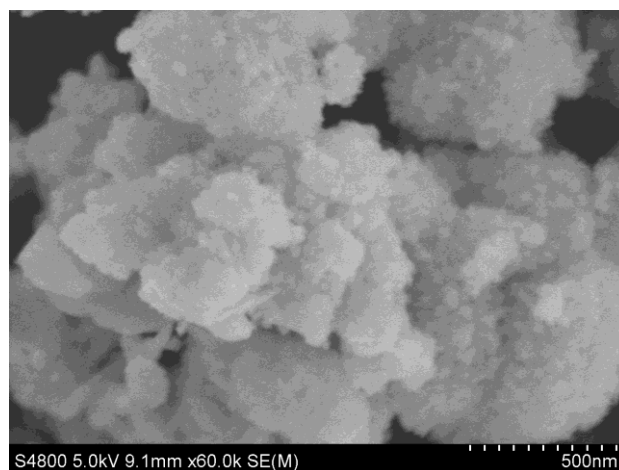

**Figure.S2** The SEM of the mix sample for  $\text{SnO}_2$  and  $\text{Sb}_2\text{O}_3$  nanomaterials

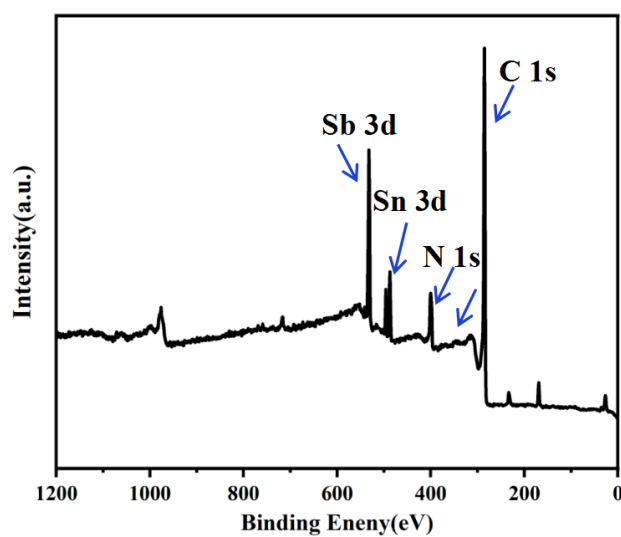

**Figure.S3** The low-resolution XPS spectra of  $\text{SnSb@NC-700}$

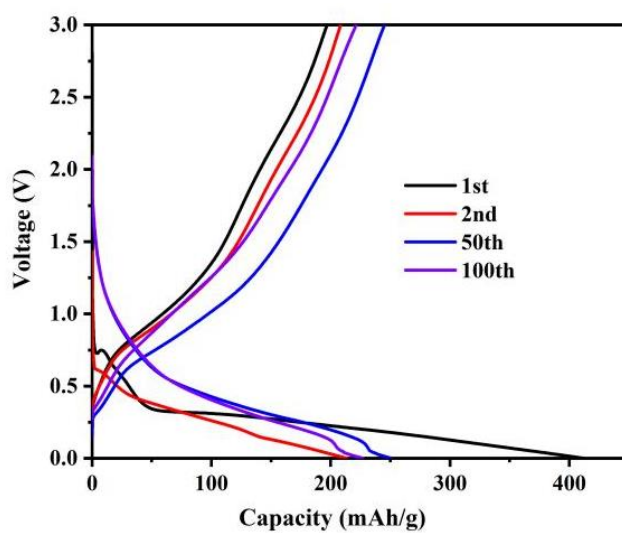

**Figure.S4** The charge/discharge curve of  $\text{SnSb@NC-700}$  electrode at different cycles (1st, 2nd, 50th, and 100th)

## Supplemental Tables

**Table S1** Compare with other SnSb, Sb, Sn related flexible materials reported in storage device

| Materials                            | Current density       | Retention capacity        | Cycle number | Reference |
|--------------------------------------|-----------------------|---------------------------|--------------|-----------|
| SnSb@NC                              | 0.1 A g <sup>-1</sup> | 240 mAh g <sup>-1</sup>   | 100          | this work |
| SbSn@NCNFs                           | 0.5 A g <sup>-1</sup> | 304 mAh g <sup>-1</sup>   | 100          | [25]      |
| Sn CNFs                              | 2 C                   | 150 mAh g <sup>-1</sup>   | 100          | [26]      |
| Sb/Sb <sub>2</sub> O <sub>3</sub> -C | 0.1 A g <sup>-1</sup> | 385.6 mAh g <sup>-1</sup> | 500          | [41]      |
| SnSb@CNF/CNT                         | 0.1 A g <sup>-1</sup> | 210 mAh g <sup>-1</sup>   | 700          | [42]      |

**Table S2** The fitted impedance parameters of the material

| Materials   | Rs( $\Omega$ ) | Rct( $\Omega$ ) |
|-------------|----------------|-----------------|
| SnSb@NC-600 | 21.57          | 1844            |
| SnSb@NC-700 | 21.42          | 1230            |

## Reference

- [25] Zhang, L.; Song, Y.; Hu, Y.; Ruan, H.; Bai, J.; Li, S.; Liu, Y.; Guo, S. Flexible Sb/Sb<sub>2</sub>O<sub>3</sub>-C nanofibers as binder-free anodes for high-performance and stable sodium-ion batteries. *J. Alloy. Compd.* **2021**, *890*, 161913. <https://doi.org/10.1016/j.jallcom.2021.161913>.
- [26] Sadan, M.K.; Kim, H.; Kim, C.; Cho, G.-B.; Cho, K.-K.; Ahn, J.-H.; Ahn, H.-J. Ultra-long cycle life of flexible Sn anode using DME electrolyte. *J. Alloy. Compd.* **2021**, *871*, 159549. <https://doi.org/10.1016/j.jallcom.2021.159549>.
- [41] Yang, L.; Yang, B.; Chen, X.; Wang, H.; Dang, J.; Liu, X. Bimetallic alloy SbSn nanodots filled in electrospun N-doped carbon fibers for high performance Na-ion battery anode. *Electrochim. Acta* **2021**, *389*, 138246. <https://doi.org/10.1016/j.electacta.2021.138246>.
- [42] Song Z, Wang G, Chen Y, Lu Y., Wen Z. In situ three-dimensional cross-linked carbon nanotube-interspersed SnSb@CNF as freestanding anode for long-term cycling sodium-ion batteries. *Chem. Eng. J.*, 2023, 463: 142289. <https://doi.org/10.1016/j.cej.2023.142289>
